# Supplementary material
Source: publisher figshare collection journal article supplement (https://acs.figshare.com/ndownloader/files/4042396)
Supplement: Supplementary file 1 [file 4042396]

## Supporting Materials

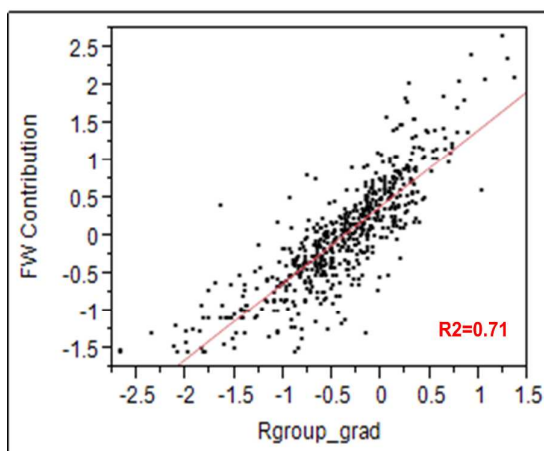

TYK2 dataset (n=576)

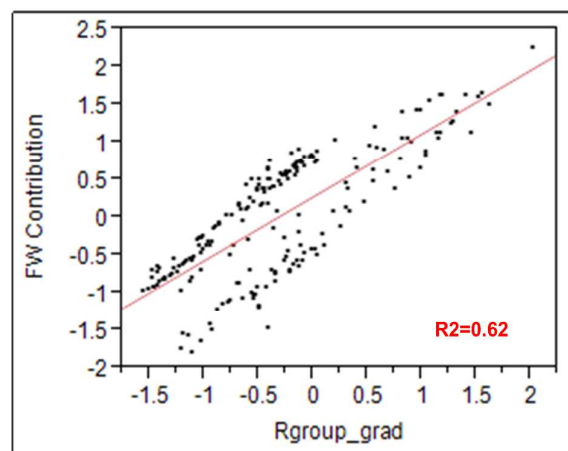

F7 dataset (n=204)

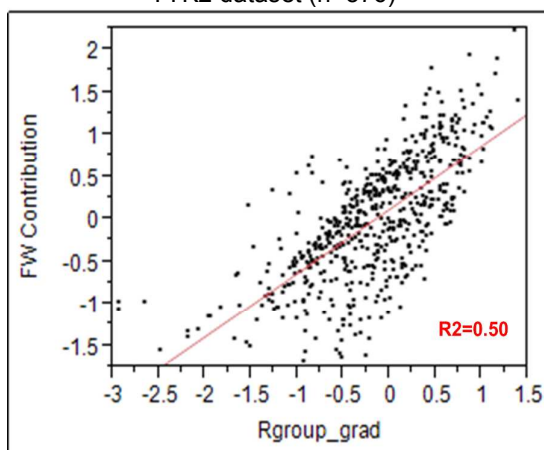

JAK1 dataset (n=573)

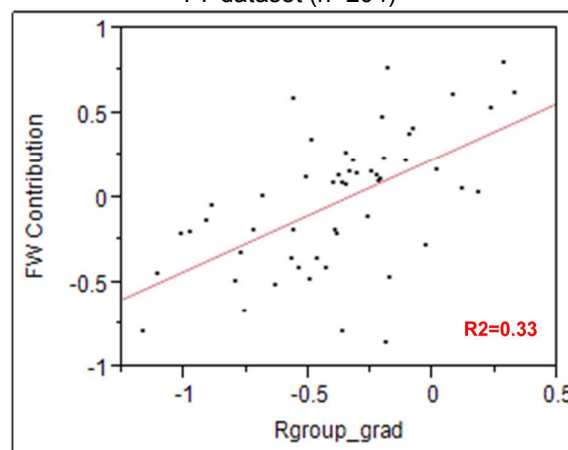

CDK5 dataset (n=53)

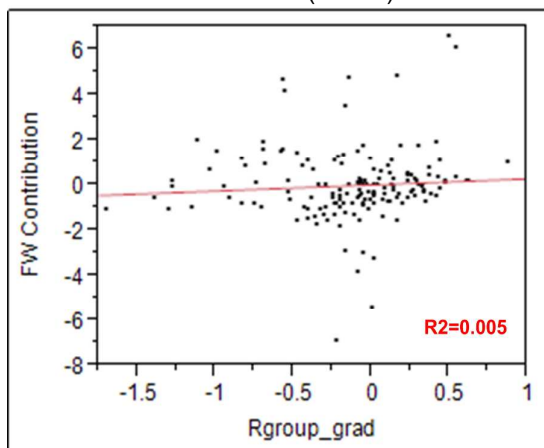

GNRHR dataset (n=157)

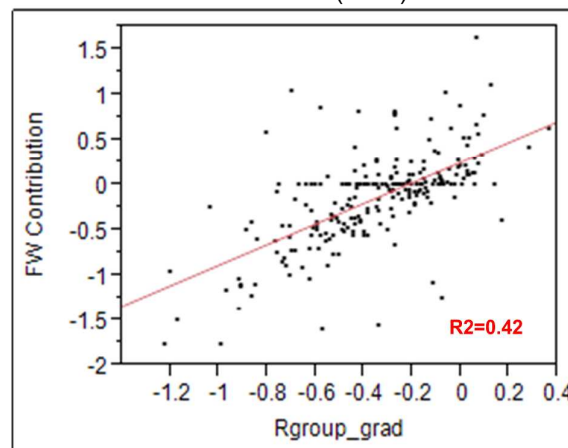

IL4 dataset (n=241, outliers=11)

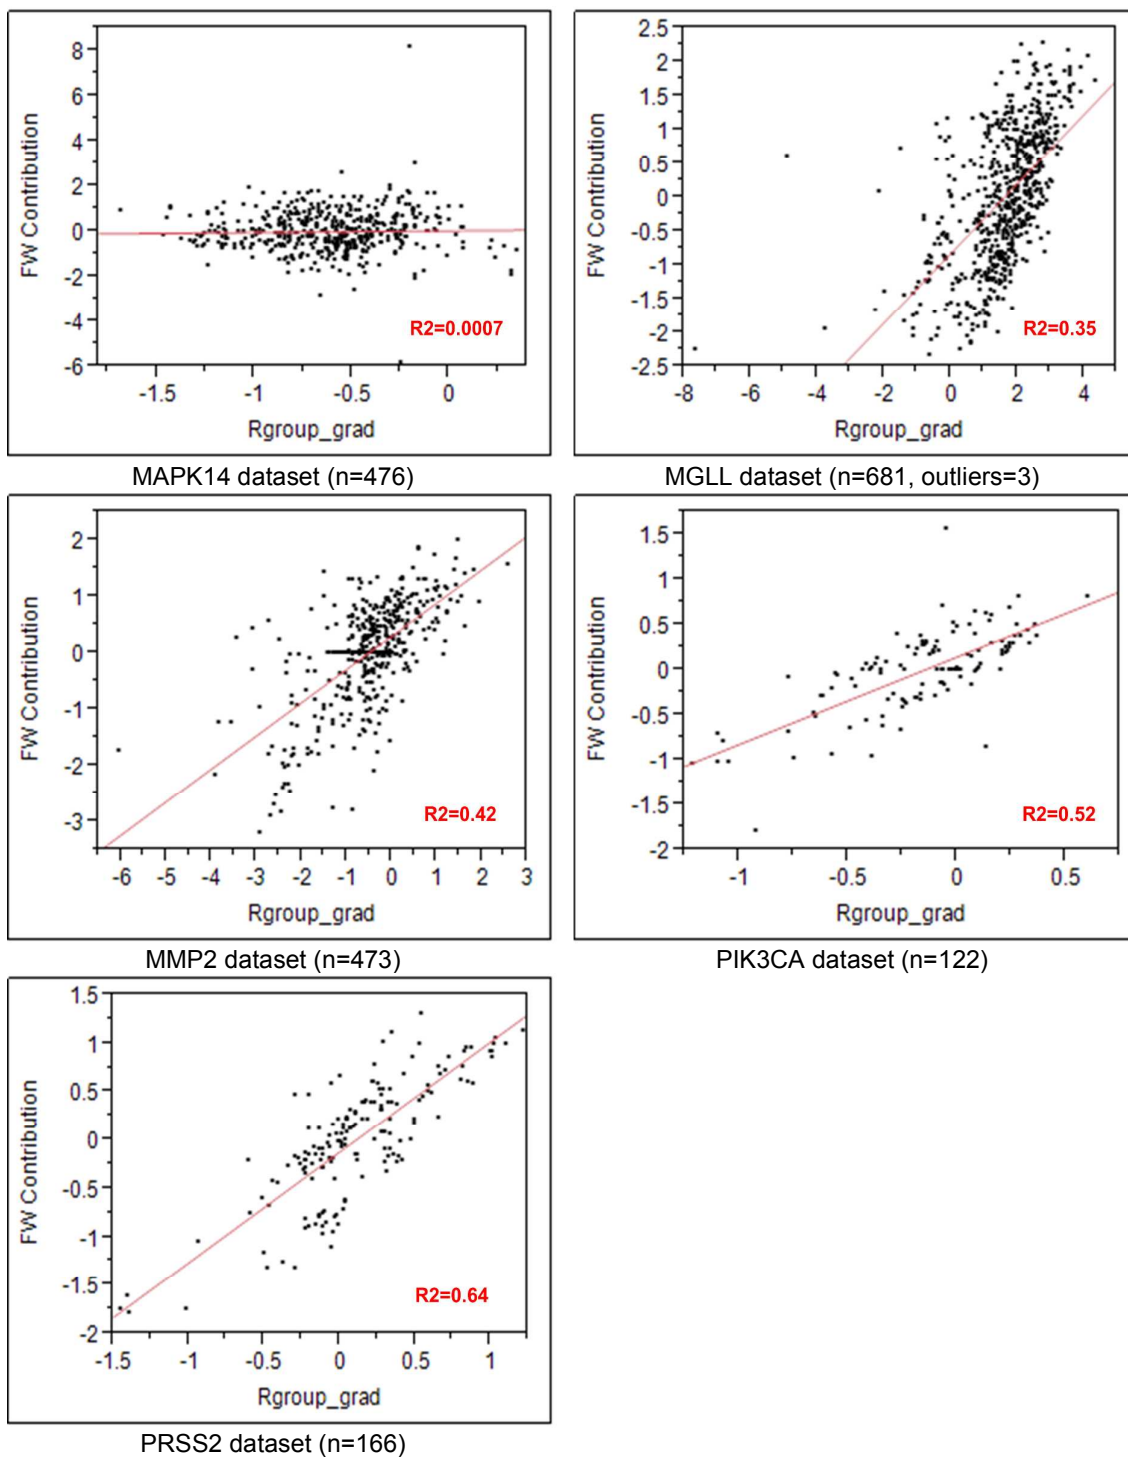

Figure S1. The correlations between R-group contributions from Free-Wilson models and R-group signature models among eleven datasets. The y axis shows the R-group contribution of the Free-Wilson model and the x axis shows the R-group contribution of the signature

model. For IL4 and MGLL dataset, the correlation is done after 11 and 3 outliers have been removed respectively.
